# Supplementary material for: Thermally evaporated methylammonium tin triiodide thin films for lead-free perovskite solar cell fabrication
Source: Royal Society of Chemistry journal article supplement (doi:10.1039/c6ra19476a), 2016-01-01
Supplement: c6ra19476a1.pdf [file c6ra19476a1.pdf]

## **Electronic Supplementary Information for:**

### **Thermally Evaporated Methylammonium Tin Triiodide Thin Films for Lead-Free Perovskite Solar Cell Fabrication**

Yue Yu,<sup>†</sup> Dewei Zhao,<sup>\*,†</sup> Corey R. Grice,<sup>†</sup> Weiwei Meng,<sup>†</sup> Changlei Wang,<sup>†</sup> Weiqiang Liao,<sup>†</sup> Alexander J. Cimaroli,<sup>†</sup> Hongmei Zhang,<sup>‡</sup> Kai Zhu,<sup>‡</sup> and Yanfa Yan<sup>\*,†</sup>

<sup>†</sup>Department of Physics and Astronomy, and Wright Center for Photovoltaics Innovation and Commercialization, The University of Toledo, Toledo, OH 43606, USA.

<sup>‡</sup>Institute of Advanced Materials and Key Laboratory for Organic Electronics & Information Displays, Nanjing University of Posts & Telecommunications, Nanjing 210023, P.R. China

<sup>‡</sup>Chemistry and Nanoscience Center, National Renewable Energy Laboratory, 15013 Denver West Parkway, Golden, CO 80401, USA

#### **Corresponding authors**

Email: D.Z. Email: dewei\_zhao@hotmail.com; Y.Y. Email: yanfa.yan@utoledo.edu

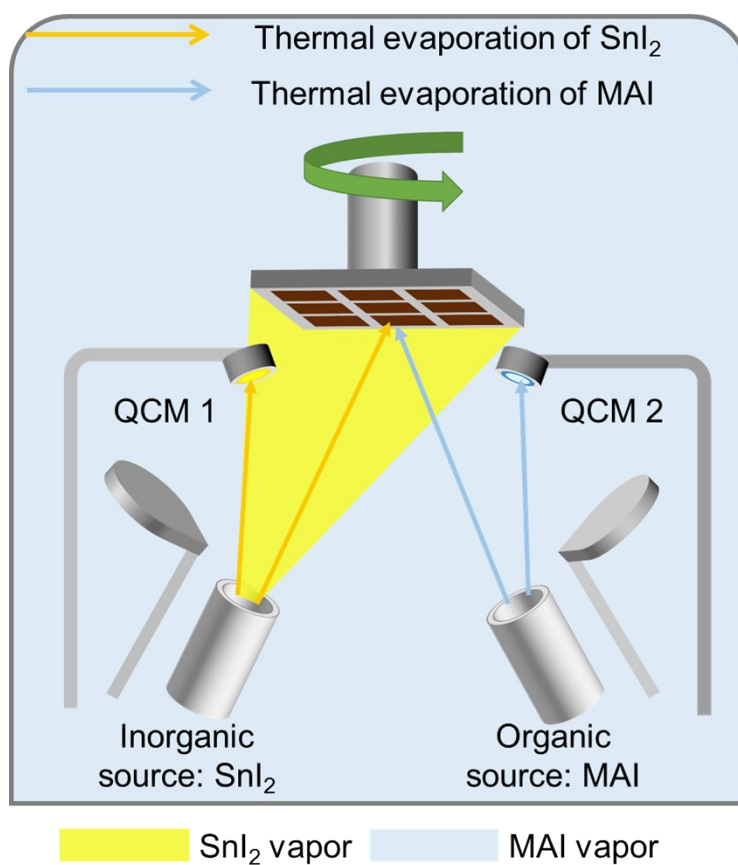

**Fig. S1** The schematic diagram of the hybrid thermal evaporation process of the  $\text{CH}_3\text{NH}_3\text{SnI}_3$  by using  $\text{SnI}_2$  and MAI as the inorganic and organic precursor source, respectively.

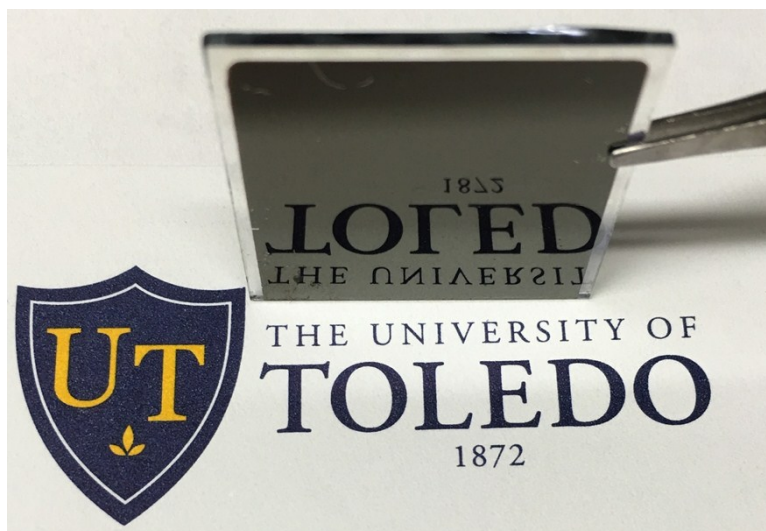

**Fig. S2** A photo showing the highly reflective surface of the as-deposited  $\text{MASnI}_3$  thin film.

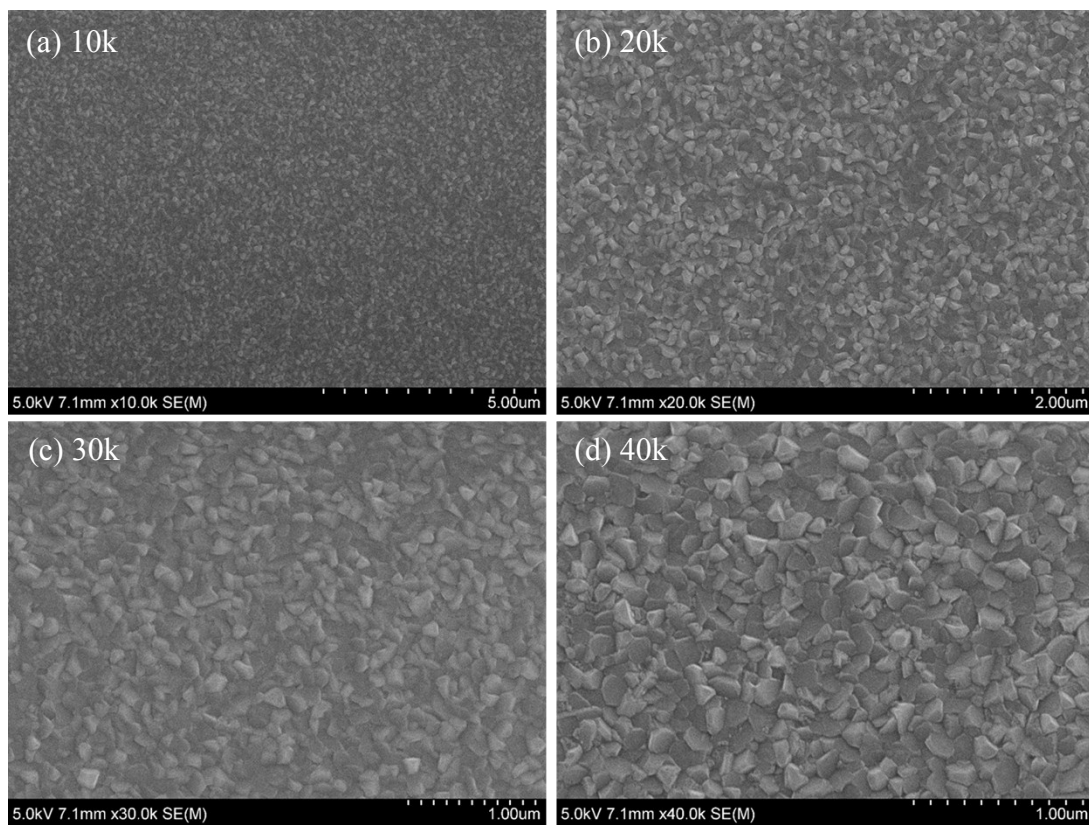

**Fig. S3** Top-view SEM images of the MASnI<sub>3</sub> thin film taken at different magnifications (a) 10k, (b) 20k, (c) 30k, and (d) 40k.

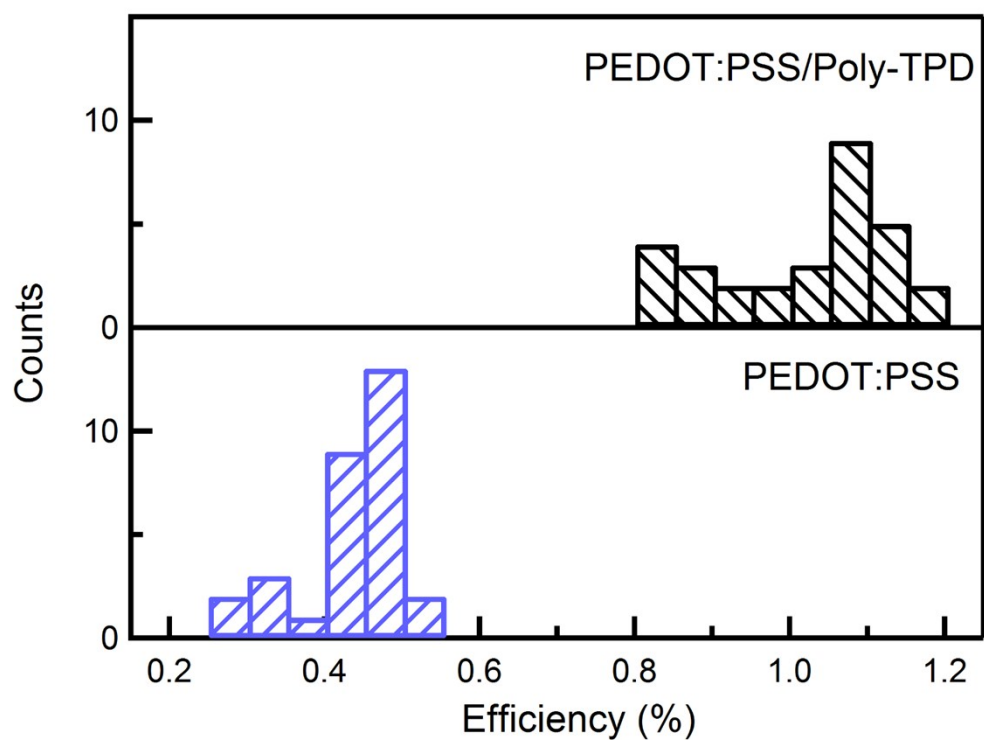

**Fig. S4** The efficiency histogram of MASnI<sub>3</sub> perovskite solar cells with PEDOT:PSS-only and PEDOT:PSS/Poly-TPD hole selective layer and 30 nm C<sub>60</sub> layer.

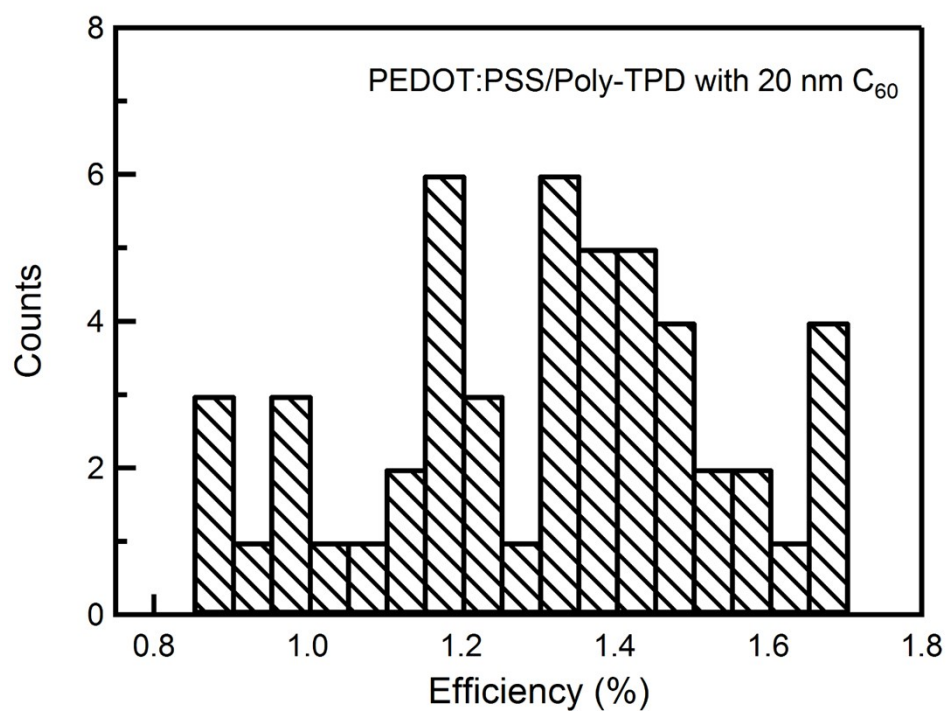

**Fig. S5** The efficiency histogram of MASnI<sub>3</sub> perovskite solar cells with 20 nm C<sub>60</sub> layer.

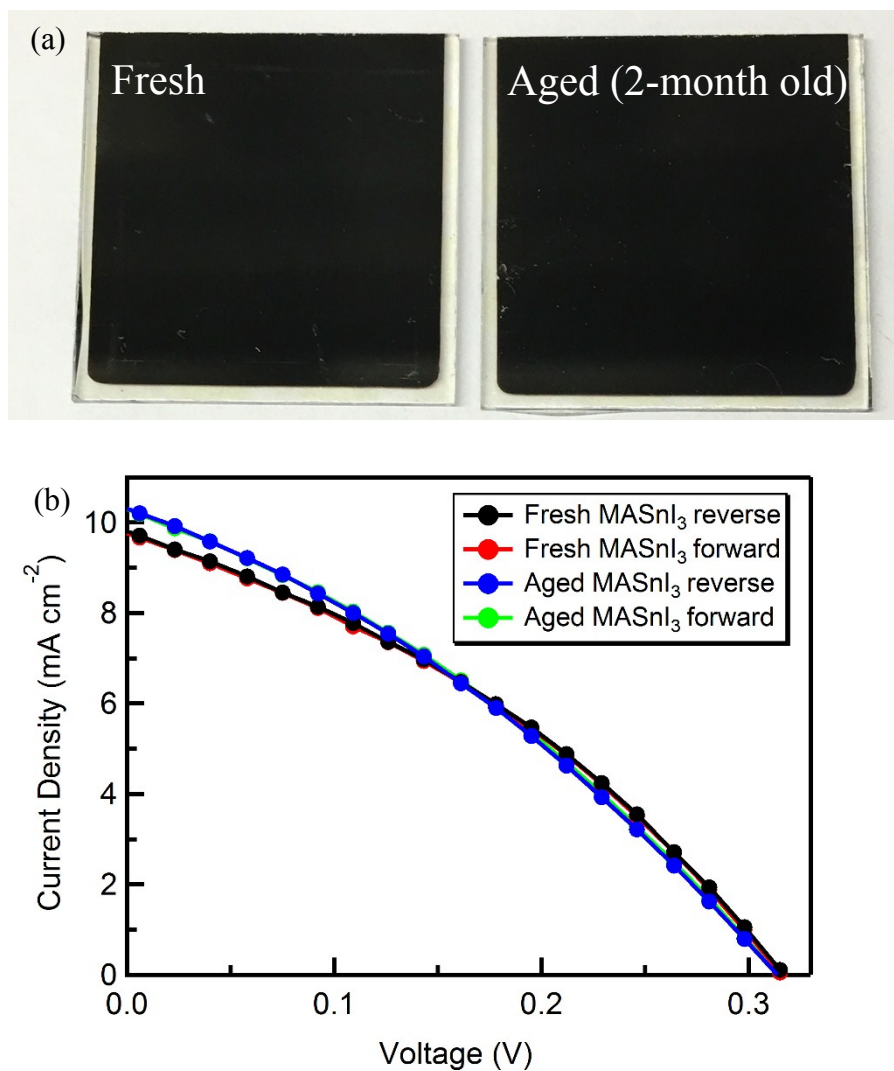

**Fig. S6** (a) Photos of the fresh  $\text{MASnI}_3$  film and the  $\text{MASnI}_3$  film stored in a nitrogen-filled glove box for more than two months. (b)  $J$ - $V$  curves of  $\text{MASnI}_3$  perovskite cells using fresh and aged (2-month old)  $\text{MASnI}_3$  as the light harvesters. No obvious difference of the either the appearance or the device performance between these two samples.

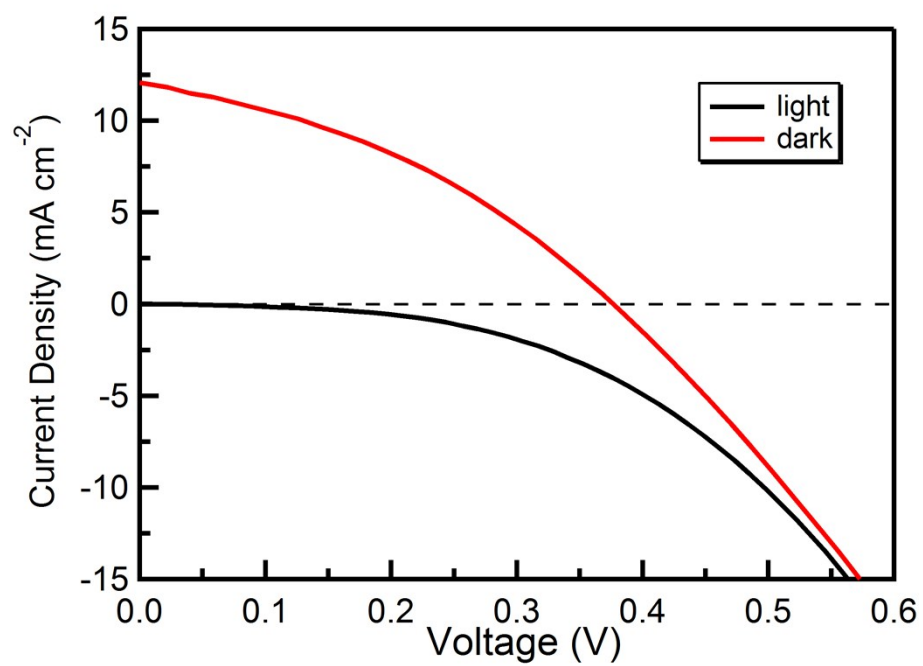

**Fig. S7** A representative light and dark  $J$ - $V$  curve of MASnI<sub>3</sub> perovskite cells.
